# Supplementary material for: Cyanidin-3-O-Glucoside Rescues Zearalenone-Induced Apoptosis via the ITGA7-PI3K-AKT Signaling Pathway in Porcine Ovarian Granulosa Cells
Source: MDPI journal article supplement (doi:10.3390/ijms24054441), 2023-02-23
Supplement: s1 [file s1]

## **Supporting Information**

### **Cyanidin-3-O-glucoside Rescues Zearalenone-induced Apoptosis via the ITGA7-PI3K-AKT Signaling Pathway in Porcine Ovarian Granulosa Cells**

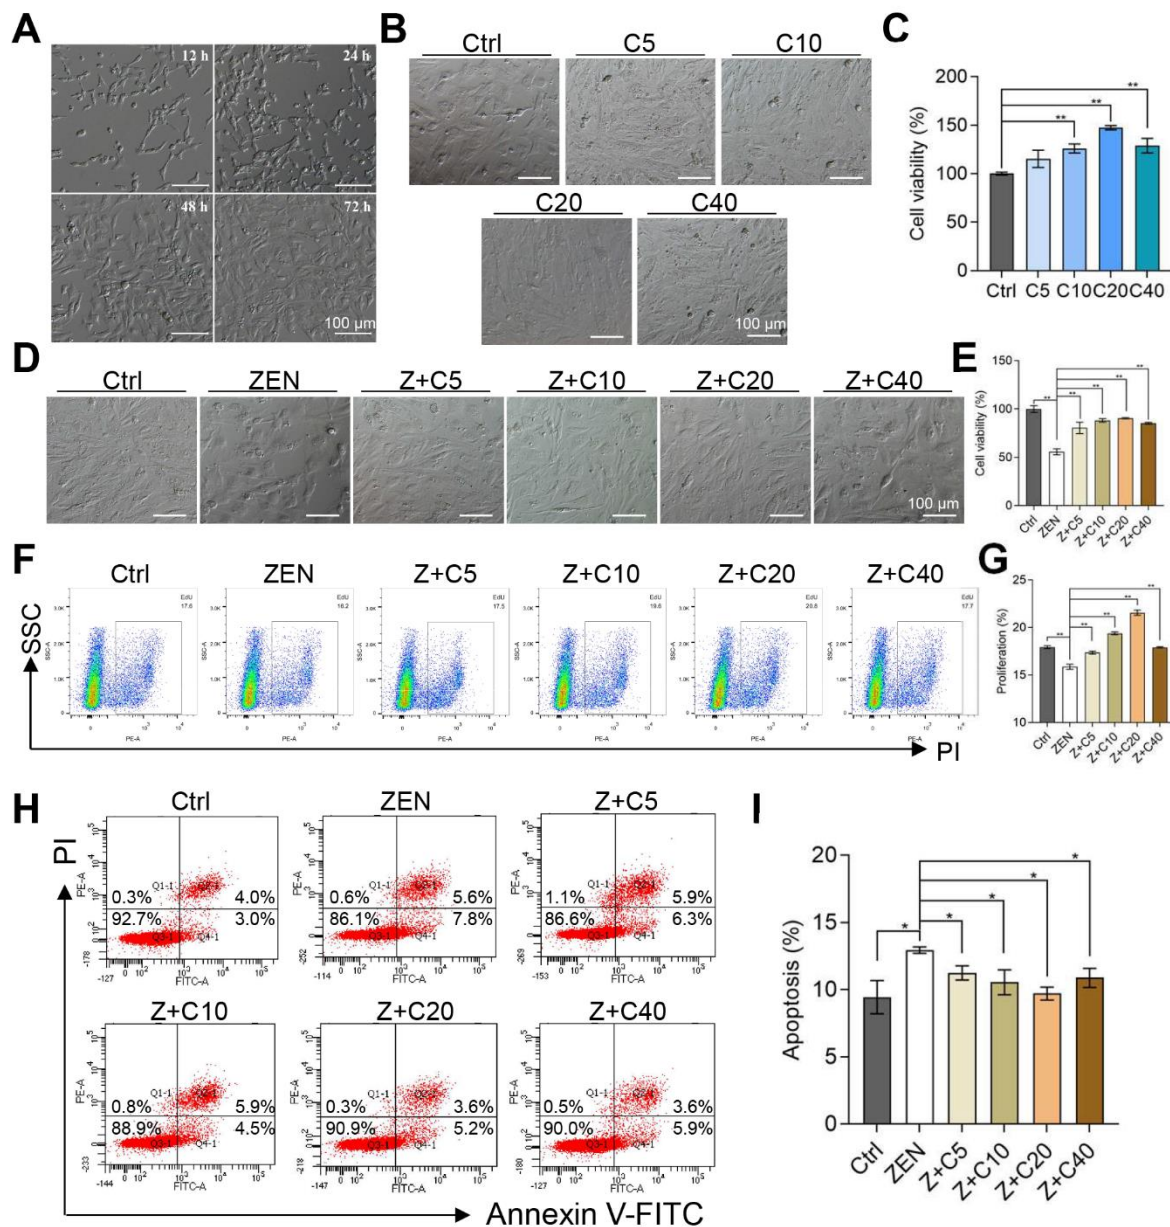

**Figure S1.** 20  $\mu$ M is the optimum concentration of C3G to protect pGCs from toxic effects induced by ZEN. (A) Morphology of primary pGCs after cultivation for 12 h, 24 h, 48 h and 72 h, respectively. (B) pGCs were harvested at 24 h after addition with 5  $\mu$ M, 10  $\mu$ M, 20  $\mu$ M, 40  $\mu$ M C3G, respectively. The corresponding concentration of DMSO as a vehicle control. (C) Representative results of cell viability detected by CCK-8 determined from images in (B). (D) pGCs were collected at 24 h after addition of 30  $\mu$ M ZEN and/or 5  $\mu$ M, 10  $\mu$ M, 20  $\mu$ M, 40  $\mu$ M C3G, respectively. The corresponding concentration of DMSO as a vehicle control. (E) Representative results of cell viability detected by CCK-8 determined from images in (D). (F) The proliferation rates were detected by flow cytometry using EdU staining in the six groups. (G) Representative results of cell proliferation rates determined from flow cytometry in (F). (H) The apoptosis were detected by flow cytometry using annexin V-FITC/PI staining. (I) Representative results of apoptosis cell rates determined from (H). Results were quantified as mean  $\pm$  SEM; n = 3. All experiments were repeated at least three times. \* $p$  < 0.05, \*\* $p$  < 0.01. Scale bar: 100  $\mu$ m.

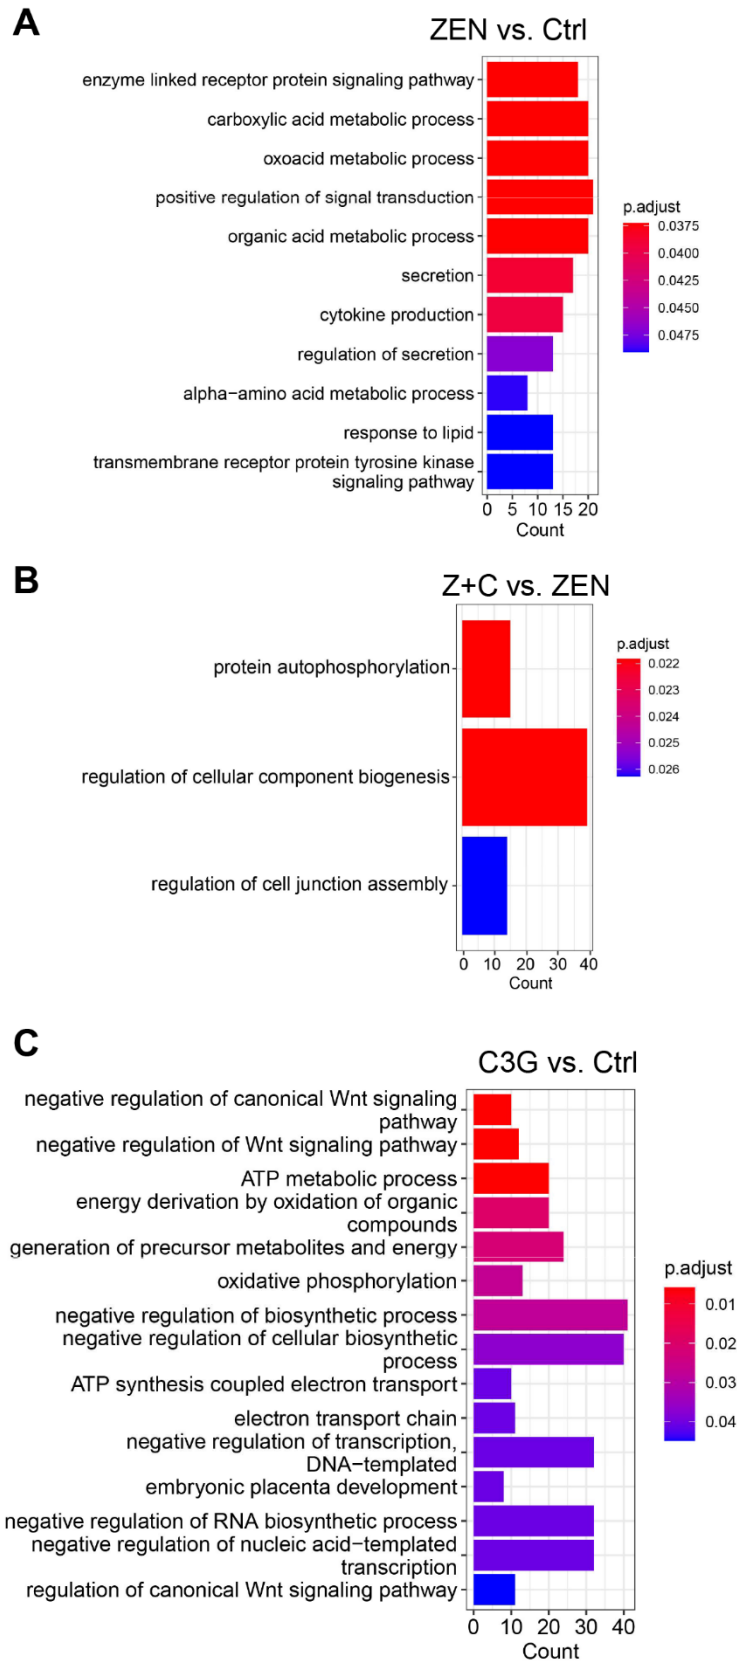

**Figure S2.** GO enrichment analysis. The histogram demonstrates GO enrichment results of DEmRNAs from ZEN versus Ctrl (A), Z+C versus ZEN (B) and C3G versus Ctrl (C) groups.

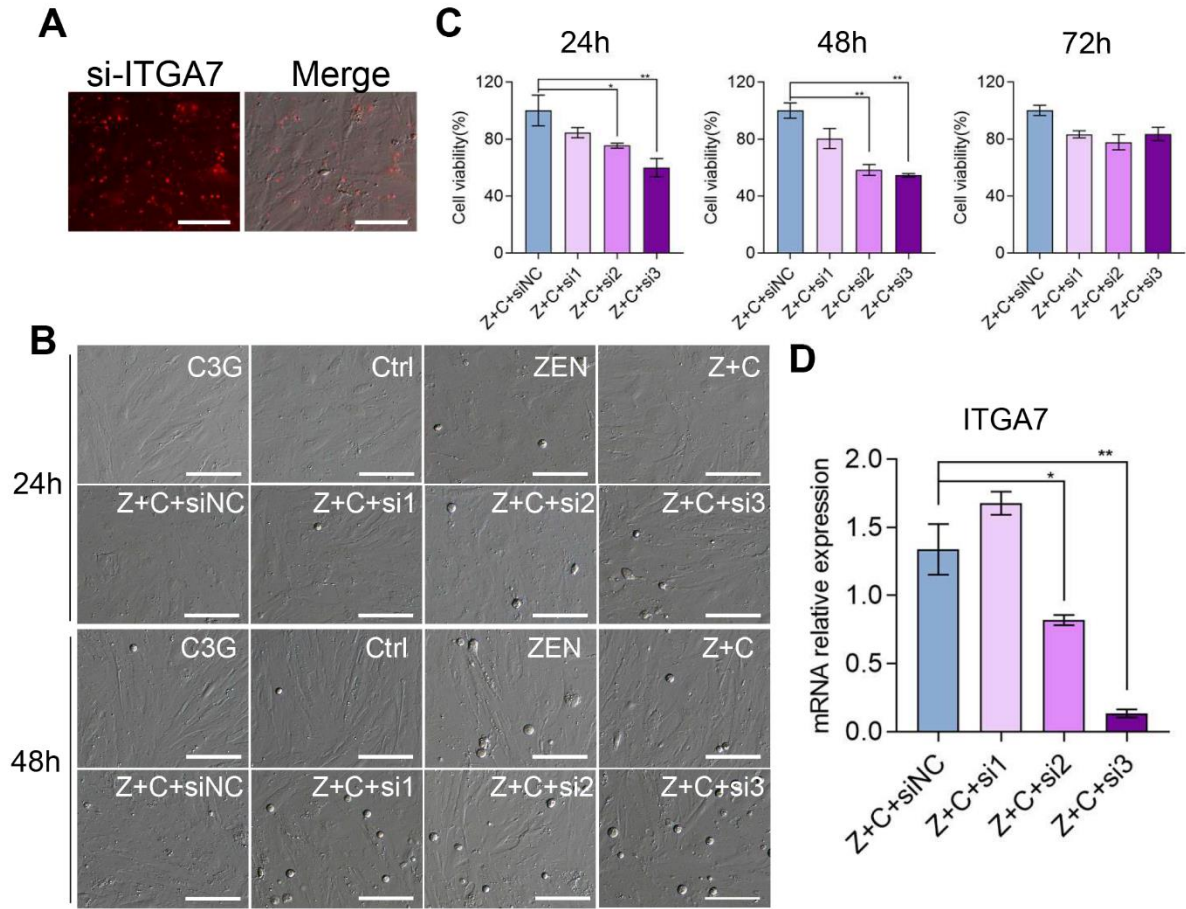

**Figure S3.** siITGA7 exploration and optimization of transfection conditions. (A) Morphology of primary pGCs transfected with si-ITGA7 (red) fragments for 6 h. (B) pGCs were collected at 24 h and 48 h in the Ctrl, ZEN, Z+C, C3G, NC, Z+C+si1, Z+C+si2, Z+C+si3 groups, respectively. (C) Cell viability of pGCs harvested at 24 h, 48 h and 72 h after transfection with ITGA7-Sus-1282 (si1), ITGA7-Sus-1731 (si2), and ITGA7-Sus-3018 (si3) fragments, respectively. (D) Relative mRNA expression levels of *ITGA7* in pGCs transfected with si1, si2, and si3 fragments. Results were quantified as mean  $\pm$  SEM;  $n = 3$ . All experiments were repeated at least three times. \* $p < 0.05$ , \*\* $p < 0.01$ . Scale bar: 100  $\mu\text{m}$ .

## Tables

Table S1 Sequences of mRNA Primers

| Primer name   | Pubmed ID      | Sequence (5'→3')          | GC(%) | Tm (°C) |
|---------------|----------------|---------------------------|-------|---------|
| <i>ATF4</i>   | NM_001123078.1 | F: CGATTCCATCAAAACTCCGC   | 50.0  | 62.8    |
|               |                | R: CACTGACCAACCCATCCACA   | 55.0  | 62.9    |
| <i>CCND3</i>  | NM_001078678.1 | F: TACACGGACCACTCTGTCTCTC | 54.5  | 59.4    |
|               |                | R: TGGCAAAGGTGTAATCTGTAGC | 45.5  | 59.3    |
| <i>CDKN1A</i> | XM_013977858.2 | F: AACTTTGAGGTCCCCTTGCC   | 55.0  | 60.18   |
|               |                | R: GGGCCCTACTTTCACTGGAC   | 60.0  | 60.04   |
| <i>GAPDH</i>  | NM_001206359.1 | F: GCCATCACCATCTTCCAGG    | 57.9  | 61.5    |
|               |                | R: TCACGCCCATCACAAACAT    | 47.4  | 61.0    |
| <i>ITGA7</i>  | XM_021091233.1 | F: AGACGGCTTCCCAGACATTG   | 55.0  | 60.4    |
|               |                | R: AATGGTTCCCATCCACGTCC   | 55.0  | 60.4    |
| <i>PCK2</i>   | NM_001161753.1 | F: CAAGGATGTGGCACGAGTAGA  | 52.4  | 61.2    |
|               |                | R: CACCACATAGGCTGAGTCCG   | 60.0  | 61.7    |

Table S2 Antibodies used in the experiment of WB

| Names       | Description       | Company                        | Catalogue# | Dilution |
|-------------|-------------------|--------------------------------|------------|----------|
| AKT         | Rabbit polyclonal | Sangong                        | D15537     | 500×     |
| p-AKT(s473) | Rabbit polyclonal | Affinity                       | AF0016     | 500×     |
| CCND3       | Rabbit polyclonal | Affinity                       | DF6229     | 500×     |
| CDKN1A      | Rabbit polyclonal | Sangong                        | D120403    | 200×     |
| β-actin     | Rabbit polyclonal | Sangong                        | D110001    | 1000×    |
| ITGA7       | Rabbit polyclonal | ABcolonal                      | A14246     | 500×     |
| PIK3CA      | Rabbit polyclonal | ABcolonal                      | A0265      | 1000×    |
| p-PI3K(p85) | Rabbit polyclonal | ABcolonal                      | A11177     | 1000×    |
| Caspase-9   | Rabbit polyclonal | Abcam                          | ab202068   | 1000×    |
| PCNA        | Mouse polyclonal  | Abcam                          | ab29       | 1000×    |
| Bcl-2       | Rabbit polyclonal | Beyotime                       | AB112-1    | 1000×    |
| Bax         | Rabbit polyclonal | Cell signaling Technology(CST) | 2772S      | 1000×    |
| HRP-IgG     | Goat anti Rabbit  | Beyotime                       | A0208      | 2000×    |
| HRP-IgG     | Goat anti mouse   | Beyotime                       | A0216      | 2000×    |

---

Table S3 Consequences of si-*ITGA7*

---

| Names                 | Sequence (5'→3')                                                 |
|-----------------------|------------------------------------------------------------------|
| Negative control (NC) | Sense: UUCUCCGAACGUGUCACGUTT<br>Antisense: ACGUGACACGUUCGGAGAATT |
| ITGA7-Sus-1282 (si1)  | Sense: GGCCCUGAAUAGCUACUUATT<br>Antisense: UAAGUAGCUAUUCAGGGCCTT |
| ITGA7-Sus-1731 (si2)  | Sense: GGGAUGGGAAAGUCUUCAUTT<br>Antisense: AUGAAGACUUUCCCAUCCCTT |
| ITGA7-Sus-3018 (si3)  | Sense: GCAGCAAGGUCAAGUAUGATT<br>Antisense: UCAUACUUGACCUUGCUGCTT |

---

Table S4 Analysis of BP GO terms of DEmRNAs in the ZEN versus Ctrl group

| ID         | Description                                                      | GeneRatio | $P_{\text{adjust}}$ |
|------------|------------------------------------------------------------------|-----------|---------------------|
| GO:0007167 | enzyme linked receptor protein signaling pathway                 | 18/160    | 0.029728            |
| GO:0019752 | carboxylic acid metabolic process                                | 20/160    | 0.029728            |
| GO:0033993 | response to lipid                                                | 14/160    | 0.029728            |
| GO:0043436 | oxoacid metabolic process                                        | 20/160    | 0.029728            |
| GO:0009967 | positive regulation of signal transduction                       | 21/160    | 0.029728            |
| GO:0006082 | organic acid metabolic process                                   | 20/160    | 0.029728            |
| GO:0046903 | secretion                                                        | 17/160    | 0.029728            |
| GO:0051091 | positive regulation of DNA-binding transcription factor activity | 9/160     | 0.029728            |
| GO:0001816 | cytokine production                                              | 15/160    | 0.030848            |
| GO:0051046 | regulation of secretion                                          | 13/160    | 0.035444            |
| GO:0051049 | regulation of transport                                          | 23/160    | 0.035444            |
| GO:1901605 | alpha-amino acid metabolic process                               | 8/160     | 0.036786            |
| GO:0007169 | transmembrane receptor protein tyrosine kinase signaling pathway | 13/160    | 0.041688            |
| GO:0022612 | gland morphogenesis                                              | 6/160     | 0.044479            |
| GO:0051090 | regulation of DNA-binding transcription factor activity          | 10/160    | 0.044479            |
| GO:0003008 | system process                                                   | 23/160    | 0.044479            |
| GO:0007267 | cell-cell signaling                                              | 21/160    | 0.044479            |
| GO:0010647 | positive regulation of cell communication                        | 21/160    | 0.044479            |
| GO:0030282 | bone mineralization                                              | 6/160     | 0.044479            |
| GO:0051047 | positive regulation of secretion                                 | 8/160     | 0.044479            |
| GO:0030111 | regulation of Wnt signaling pathway                              | 8/160     | 0.044645            |
| GO:0023056 | positive regulation of signaling                                 | 21/160    | 0.044645            |
| GO:0048584 | positive regulation of response to stimulus                      | 25/160    | 0.046164            |
| GO:0016055 | Wnt signaling pathway                                            | 10/160    | 0.046164            |
| GO:0140352 | export from cell                                                 | 15/160    | 0.046164            |
| GO:0051050 | positive regulation of transport                                 | 13/160    | 0.046164            |
| GO:0001666 | response to hypoxia                                              | 6/160     | 0.046164            |
| GO:0044283 | small molecule biosynthetic process                              | 13/160    | 0.046164            |
| GO:0198738 | cell-cell signaling by wnt                                       | 10/160    | 0.046164            |
| GO:0036293 | response to decreased oxygen levels                              | 6/160     | 0.048209            |

Table S5 Analysis of BP GO terms of DEmRNAs in the Z+C versus ZEN group

| ID         | Description                                 | GeneRatio | $P_{\text{adjust}}$ |
|------------|---------------------------------------------|-----------|---------------------|
| GO:0046777 | protein autophosphorylation                 | 15/506    | 0.021827004         |
| GO:0044087 | regulation of cellular component biogenesis | 39/506    | 0.021827004         |
| GO:1901888 | regulation of cell junction assembly        | 14/506    | 0.026274854         |

Table S6 Analysis of BP GO terms of DEmRNAs in the C3G versus Ctrl group

| ID         | Description                                            | GeneRatio | $P_{\text{adjust}}$ |
|------------|--------------------------------------------------------|-----------|---------------------|
| GO:0090090 | negative regulation of canonical Wnt signaling pathway | 10/417    | 0.004305            |
| GO:0030178 | negative regulation of Wnt signaling pathway           | 12/417    | 0.004305            |
| GO:0046034 | ATP metabolic process                                  | 20/417    | 0.004305            |
| GO:0015980 | energy derivation by oxidation of organic compounds    | 20/417    | 0.014629            |
| GO:0006091 | generation of precursor metabolites and energy         | 24/417    | 0.015724            |
| GO:0006119 | oxidative phosphorylation                              | 13/417    | 0.02181             |
| GO:0009890 | negative regulation of biosynthetic process            | 40/417    | 0.038149            |
| GO:0042773 | ATP synthesis coupled electron transport               | 10/417    | 0.039565            |
| GO:0022900 | electron transport chain                               | 11/417    | 0.040567            |
| GO:0031327 | negative regulation of cellular biosynthetic process   | 39/417    | 0.040567            |
| GO:0001892 | embryonic placenta development                         | 8/417     | 0.042338            |
| GO:0060828 | regulation of canonical Wnt signaling pathway          | 11/417    | 0.04672             |

Table S7 Analysis of KEGG terms of DEmRNAs in the ZEN versus Ctrl group

| ID       | Description                 | GeneRatio | $P_{\text{adjust}}$ |
|----------|-----------------------------|-----------|---------------------|
| ssc04020 | Calcium signaling pathway   | 17/189    | 0.002609472         |
| ssc01230 | Biosynthesis of amino acids | 9/189     | 0.002609472         |
| ssc05146 | Amoebiasis                  | 10/189    | 0.003978355         |
| ssc05205 | Proteoglycans in cancer     | 14/189    | 0.008092439         |
| ssc04151 | PI3K-Akt signaling pathway  | 18/189    | 0.022021458         |



Table S8 Analysis of KEGG terms of DEmRNAs in the Z+C versus ZEN group

| ID       | Description                                     | GeneRatio | <i>P</i> <sub>adjust</sub> |
|----------|-------------------------------------------------|-----------|----------------------------|
| ssc04510 | Focal adhesion                                  | 38/606    | 1.75E-06                   |
| ssc04512 | ECM-receptor interaction                        | 23/606    | 1.94E-06                   |
| ssc05165 | Human papillomavirus infection                  | 51/606    | 1.94E-06                   |
| ssc01521 | EGFR tyrosine kinase inhibitor resistance       | 18/606    | 0.000283245                |
| ssc04151 | PI3K-Akt signaling pathway                      | 45/606    | 0.001276368                |
| ssc04810 | Regulation of actin cytoskeleton                | 32/606    | 0.001406276                |
| ssc05230 | Central carbon metabolism in cancer             | 15/606    | 0.001533879                |
| ssc05222 | Small cell lung cancer                          | 18/606    | 0.002114752                |
| ssc05205 | Proteoglycans in cancer                         | 30/606    | 0.002114752                |
| ssc05146 | Amoebiasis                                      | 18/606    | 0.003230987                |
| ssc04210 | Apoptosis                                       | 22/606    | 0.003230987                |
| ssc04910 | Insulin signaling pathway                       | 22/606    | 0.003230987                |
| ssc05412 | Arrhythmogenic right ventricular cardiomyopathy | 15/606    | 0.003821689                |
| ssc04010 | MAPK signaling pathway                          | 36/606    | 0.006877165                |
| ssc01522 | Endocrine resistance                            | 16/606    | 0.010423627                |
| ssc04330 | Notch signaling pathway                         | 12/606    | 0.010423627                |
| ssc04360 | Axon guidance                                   | 25/606    | 0.011168897                |
| ssc05215 | Prostate cancer                                 | 16/606    | 0.012383725                |
| ssc01250 | Biosynthesis of nucleotide sugars               | 9/606     | 0.012383725                |
| ssc05010 | Alzheimer disease                               | 43/606    | 0.012383725                |
| ssc00052 | Galactose metabolism                            | 8/606     | 0.012383725                |
| ssc05145 | Toxoplasmosis                                   | 17/606    | 0.012383725                |
| ssc04520 | Adherens junction                               | 13/606    | 0.012383725                |
| ssc00051 | Fructose and mannose metabolism                 | 8/606     | 0.014357043                |
| ssc04919 | Thyroid hormone signaling pathway               | 18/606    | 0.01531653                 |
| ssc04922 | Glucagon signaling pathway                      | 16/606    | 0.01531653                 |
| ssc05221 | Acute myeloid leukemia                          | 12/606    | 0.017523406                |

Table S9 Analysis of KEGG terms of DEmRNAs in the C3G versus Ctrl group

| ID       | Description                                              | GeneRatio | $P_{\text{adjust}}$ |
|----------|----------------------------------------------------------|-----------|---------------------|
| ssc05165 | Human papillomavirus infection                           | 38/477    | 0.001622            |
| ssc05205 | Proteoglycans in cancer                                  | 26/477    | 0.004568            |
| ssc04714 | Thermogenesis                                            | 28/477    | 0.004568            |
| ssc05415 | Diabetic cardiomyopathy                                  | 25/477    | 0.007344            |
| ssc05135 | Yersinia infection                                       | 19/477    | 0.011966            |
| ssc04668 | TNF signaling pathway                                    | 16/477    | 0.011966            |
| ssc04922 | Glucagon signaling pathway                               | 15/477    | 0.012528            |
| ssc04910 | Insulin signaling pathway                                | 18/477    | 0.012528            |
| ssc04010 | MAPK signaling pathway                                   | 30/477    | 0.012739            |
| ssc05225 | Hepatocellular carcinoma                                 | 20/477    | 0.013225            |
| ssc00760 | Nicotinate and nicotinamide metabolism                   | 8/477     | 0.014016            |
| ssc05215 | Prostate cancer                                          | 14/477    | 0.014047            |
| ssc05221 | Acute myeloid leukemia                                   | 11/477    | 0.015646            |
| ssc05224 | Breast cancer                                            | 18/477    | 0.015646            |
| ssc04390 | Hippo signaling pathway                                  | 18/477    | 0.031781            |
| ssc04152 | AMPK signaling pathway                                   | 15/477    | 0.035217            |
| ssc04611 | Platelet activation                                      | 15/477    | 0.035217            |
| ssc04931 | Insulin resistance                                       | 14/477    | 0.036151            |
| ssc05226 | Gastric cancer                                           | 17/477    | 0.03676             |
| ssc04657 | IL-17 signaling pathway                                  | 12/477    | 0.03676             |
| ssc05210 | Colorectal cancer                                        | 12/477    | 0.03676             |
| ssc04933 | AGE-RAGE signaling pathway in diabetic complications     | 13/477    | 0.03676             |
| ssc05230 | Central carbon metabolism in cancer                      | 10/477    | 0.03676             |
| ssc03015 | mRNA surveillance pathway                                | 12/477    | 0.040749            |
| ssc05213 | Endometrial cancer                                       | 9/477     | 0.041415            |
| ssc04935 | Growth hormone synthesis, secretion and action           | 14/477    | 0.044474            |
| ssc04550 | Signaling pathways regulating pluripotency of stem cells | 16/477    | 0.044622            |
| ssc04071 | Sphingolipid signaling pathway                           | 14/477    | 0.044622            |
| ssc04917 | Prolactin signaling pathway                              | 10/477    | 0.044825            |
| ssc04261 | Adrenergic signaling in cardiomyocytes                   | 16/477    | 0.045633            |
| ssc04919 | Thyroid hormone signaling pathway                        | 14/477    | 0.045633            |
| ssc05010 | Alzheimer disease                                        | 33/477    | 0.045633            |
| ssc05208 | Chemical carcinogenesis - reactive oxygen species        | 22/477    | 0.046684            |

Table S10 FPKM values and relative mRNA levels of 5 key genes in the PI3K-AKT signaling pathway

| Genes<br>Group | <i>CDKN1A</i> |         | <i>CCND3</i> |        | <i>PCK2</i>  |        | <i>ATF4</i>  |        | <i>ITGA7</i> |        |
|----------------|---------------|---------|--------------|--------|--------------|--------|--------------|--------|--------------|--------|
|                | FPKM          | mRNA    | FPKM         | mRNA   | FPKM         | mRNA   | FPKM         | mRNA   | FPKM         | mRNA   |
| Ctrl           | 80301.15±7    | 1.02±0. | 28920.66±304 | 1.02±0 | 11658.23±16  | 1.00±0 | 95632.20±176 | 1.00±0 | 480.91±95    | 1.04±0 |
|                | 938.78        | 14      | 9.19         | .14    | 0.31         | .01    | 0.77         | .06    | .19          | .19    |
| ZEN            | 214381.69±    | 11.46±1 | 39113.04±123 | 1.91±0 | 29879.71±53  | 3.71±0 | 128334.81±31 | 1.23±0 | 129.31±15    | 0.39±0 |
|                | 4996.54**     | .77**   | 7.54**       | .24**  | 1.62**       | .08**  | 81.66**      | .07*   | .47**        | .05*   |
| Z+C            | 126192.85±    | 2.68±0. | 24824.19±199 | 0.93±0 | 15122.27±10  | 2.38±0 | 79533.00±736 | 0.45±0 | 737.50±15    | 1.16±0 |
|                | 25323.42##    | 71##    | 1.07##       | .02##  | 37.70##      | .05##  | 5.08##       | .04##  | 1.67##       | .19##  |
| C3G            | 48784.48±2    | 2.19±0. | 13359.5385±4 | 0.77±0 | 6700.52±542. | 0.72±0 | 80174.33±210 | 0.33±0 | 1471.83±9    | 1.79±0 |
|                | 391.17        | 36      | 17.92**      | .07    | 87**         | .04**  | .17*         | .04**  | 8.31         | .22*   |

Note: *CDKN1A*, cyclin-dependent kinase inhibitor 1; *CCND3*, cyclin-D3; *PCK2*, phosphoenolpyruvate carboxykinase 2; *ATF4*, activating transcription factor 4; *ITGA7*, integrin subunit alpha 7. \* $P < 0.05$  and \*\* $P < 0.01$  vs. Ctrl group; ## $P < 0.01$  vs. ZEN group.
